# Supplementary material for: Neutrophil-Derived Proteases Contribute to the Pathogenesis of Early Diabetic Retinopathy
Source: PubMed Central journal article supplement — Invest Ophthalmol Vis Sci. 2021 Oct 13;62(13):7. doi: 10.1167/iovs.62.13.7 (PMC8525836; doi:10.1167/iovs.62.13.7), 2021-10-13
Supplement: iovs-62-13-7_s001.pdf [file iovs-62-13-7_s001.pdf]

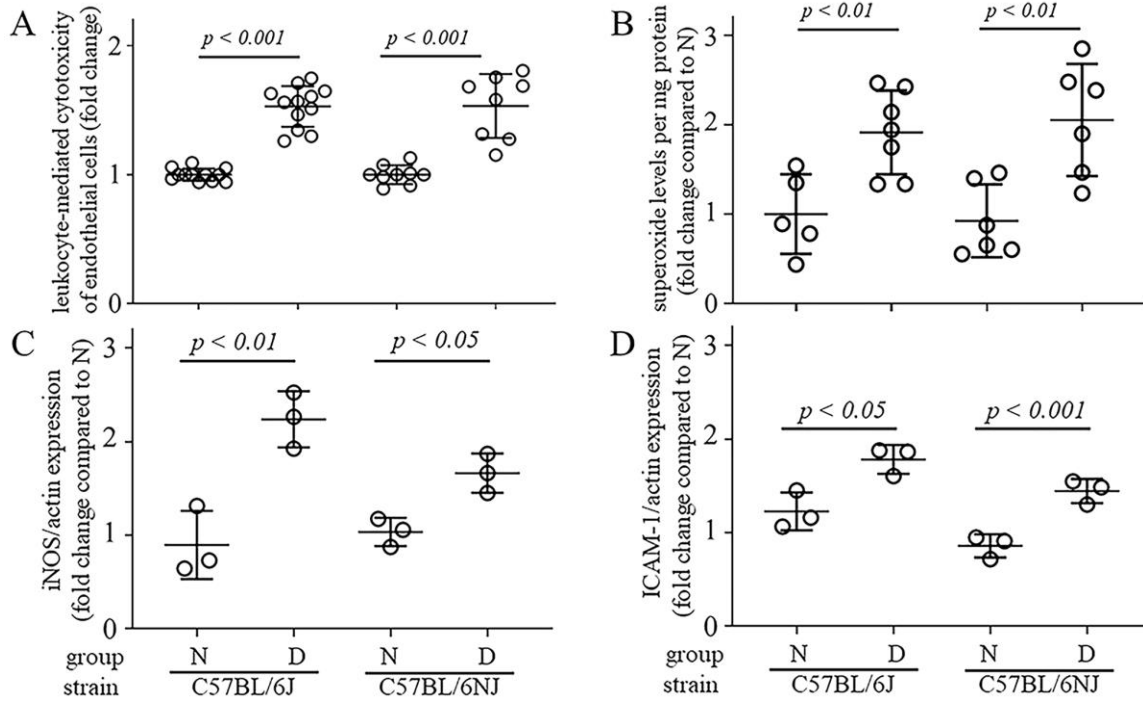

**Supplemental Figure 1.** Similarity of responses of the inbred mouse strain C57BL/6J and C57BL/6NJ to diabetes. Leukocyte-mediated cytotoxicity towards retinal endothelial cells (A), superoxide production (B) and the diabetes-induced increase in retinal expression of inflammatory proteins (C and D) was significantly increased in diabetic mice when compared to non-diabetic mice of the WT-6NJ strain, paralleling the results obtained from the WT-6J strain. Duration of diabetes was 8 weeks. N, nondiabetic; D, diabetic. Data are normalized to N and expressed as mean  $\pm$  SD. Graphs represent the combined results of 2-3 experiments.  $n=3-12$  per group.  $p < 0.05$  is significant.

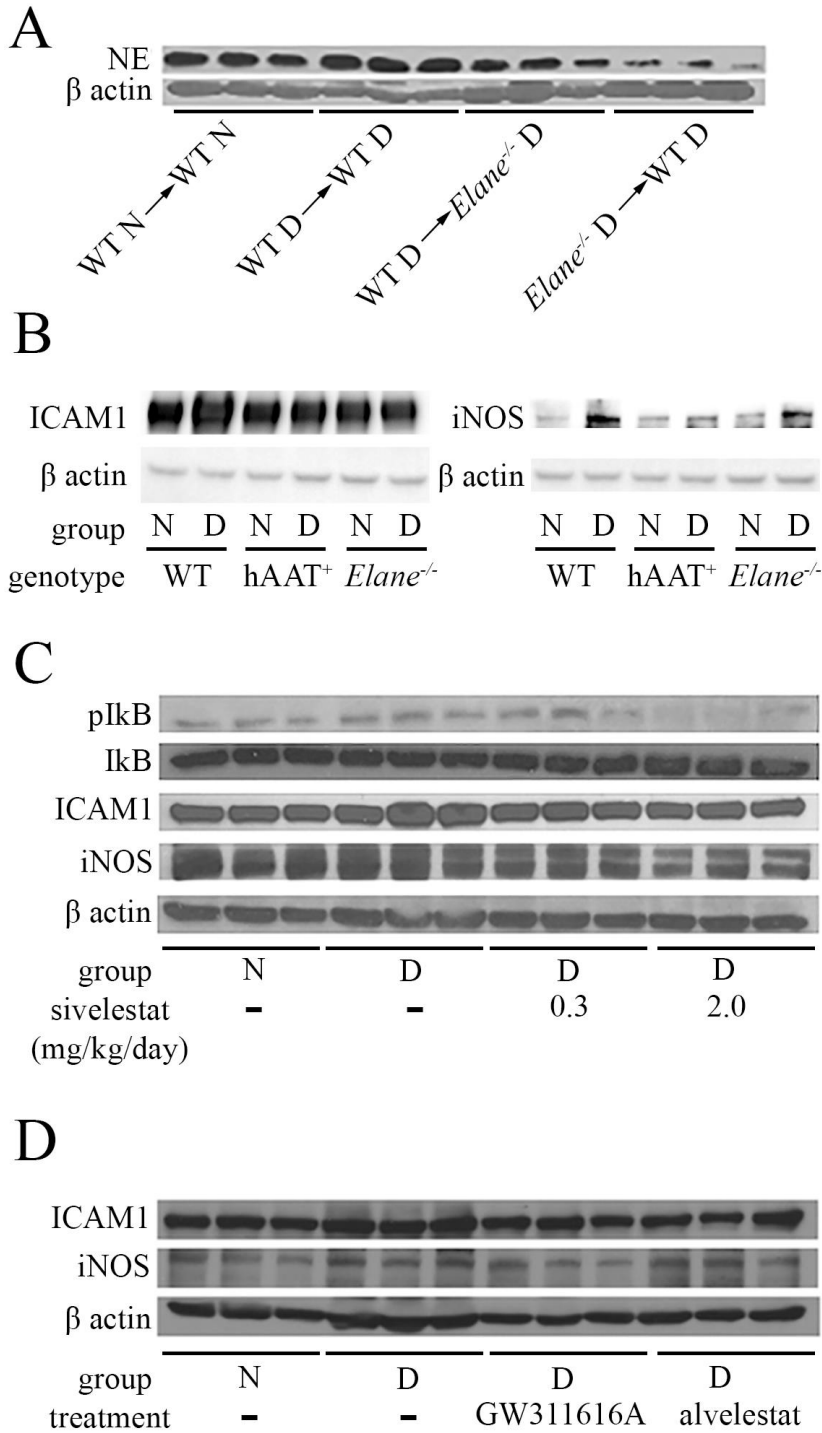

**Supplemental Figure 2.** (A) Western blot of NE in myeloid cells showing successful generation of forward and reverse bone marrow chimeric mice. The expression of NE in myeloid cells isolated from *Elane*<sup>-/-</sup> D→WT D chimeras was significantly less than in WT

D→ *Elane*<sup>-/-</sup> D mice and WT D→WT D mice. (B-D) Representative western blots showing the diabetes-induced increase in the expression of inflammatory proteins. Blots were probed against β-actin as loading control. Blots in B were used to generate graphs in Figure 4, and blots in C and D were used to generate graphs in Figure 7.
